# Supplementary material
Source: Springer Nature journal article supplement (https://www.springermedizin.de/resource/supplementary/13012_2006_66_MOESM1_ESM.pdf/9629174)
Supplement: MOESM1 [file 9629174]

## You Can Help Prevent 75% of Diabetes Deaths

Cut the risk of heart attack and stroke for your diabetic patients

**Lower BP all the way down to 130/80.**

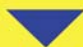

**You may need two or three drugs. One should be an ACE Inhibitor<sup>‡</sup>**

<sup>‡</sup>See reverse side

**Treat cholesterol even if it's normal**

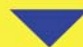

**Give a STATIN to all diabetic patients over 50 years of age\***

\*See reverse side

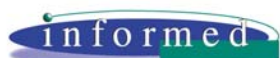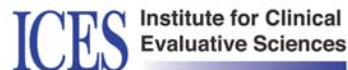

## Back

<sup>‡</sup> Additional benefit of lowering blood pressure, with agents like ACE inhibitors, includes protection of renal function.

Adverse reactions to ACE inhibitor use may include: angioedema, cough and elevated creatinine/potassium.

\* Adverse reactions to statin use may include: myalgias, myositis and rhabdomyolysis. Avoid concomitant use of statins with macrolides, some antifungals, niacin, fibrates and grapefruit juice.

For further information see <http://www.diabetes.ca/cpg2003> and *Lancet* 2003; 361:2005–16.
